# Supplementary material for: Intramolecular charge transfer induced emission from triphenylamine-o-carborane dyads
Source: Royal Society of Chemistry journal article supplement (doi:10.1039/c7ra06237k), 2017-01-01
Supplement: c7ra06237k1.pdf [file c7ra06237k1.pdf]

**Electronic Supplementary Information (ESI) for**  
**Intramolecular charge transfer induced emission from triphenylamine-*o*-**  
**carborane dyads**

Yi Wan,<sup>a‡</sup> Junfeng Li,<sup>a‡\*</sup> Xuelei Peng,<sup>a</sup> Chao Huang,<sup>a</sup> Qi Qi,<sup>b\*</sup> Wen-Yong Lai<sup>ac\*</sup> and Wei Huang<sup>ac</sup>

- a) Key Laboratory for Organic Electronics and Information Displays (KLOEID) & Institute of Advanced Materials (IAM), Jiangsu National Synergetic Innovation Center for Advanced Materials (SICAM), 9 Wenyuan Road, Nanjing 210023, China
- b) School of Chemistry and Chemical Engineering, Southeast University, Nanjing 211189, China
- c) Key Laboratory of Flexible Electronics (KLOFE) & Institute of Advanced Materials (IAM), Jiangsu National Synergetic Innovation Center for Advanced Materials (SICAM), Nanjing Tech University (NanjingTech), 30 South Puzhu Road, Nanjing 211816, China

‡ These authors contributed equally to this work.

\*Correspondence to: iamjfli@njupt.edu.cn; qiqi027@163.com; iamwylai@njupt.edu.cn

**Table of contents**

|          |                                                               |                  |
|----------|---------------------------------------------------------------|------------------|
| <b>1</b> | <b>NMR spectra &amp; MALDI-TOF spectra .....</b>              | <b>2</b>         |
| <b>2</b> | <b>Thermo-gravimetric analysis .....</b>                      | <b>6</b>         |
| <b>3</b> | <b>Solvatochromism .....</b>                                  | <b>6</b>         |
| <b>4</b> | <b>Time-resolved emission decay .....</b>                     | <b>7</b>         |
| <b>5</b> | <b>Density functional calculations.....</b>                   | <b>8</b>         |
| <b>6</b> | <b>Electrochemistry.....</b>                                  | <b>8</b>         |
| <b>7</b> | <b>Emission spectra .....</b>                                 | <b>错误！未定义书签。</b> |
| <b>8</b> | <b>Emission spectra and Time-resolved emission decay.....</b> | <b>9</b>         |

# 1 NMR Spectra & MALDI-TOF spectra

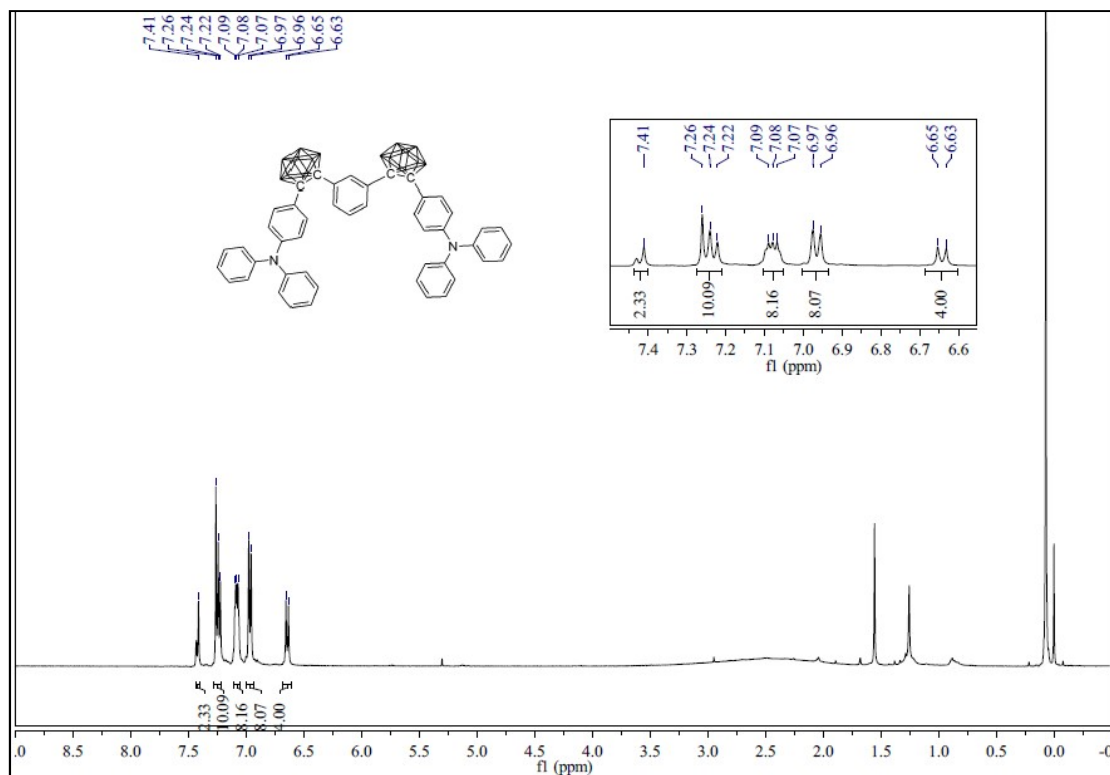

Fig. S1  $^1\text{H}$  NMR spectrum of **o-1** in  $\text{CDCl}_3$ .

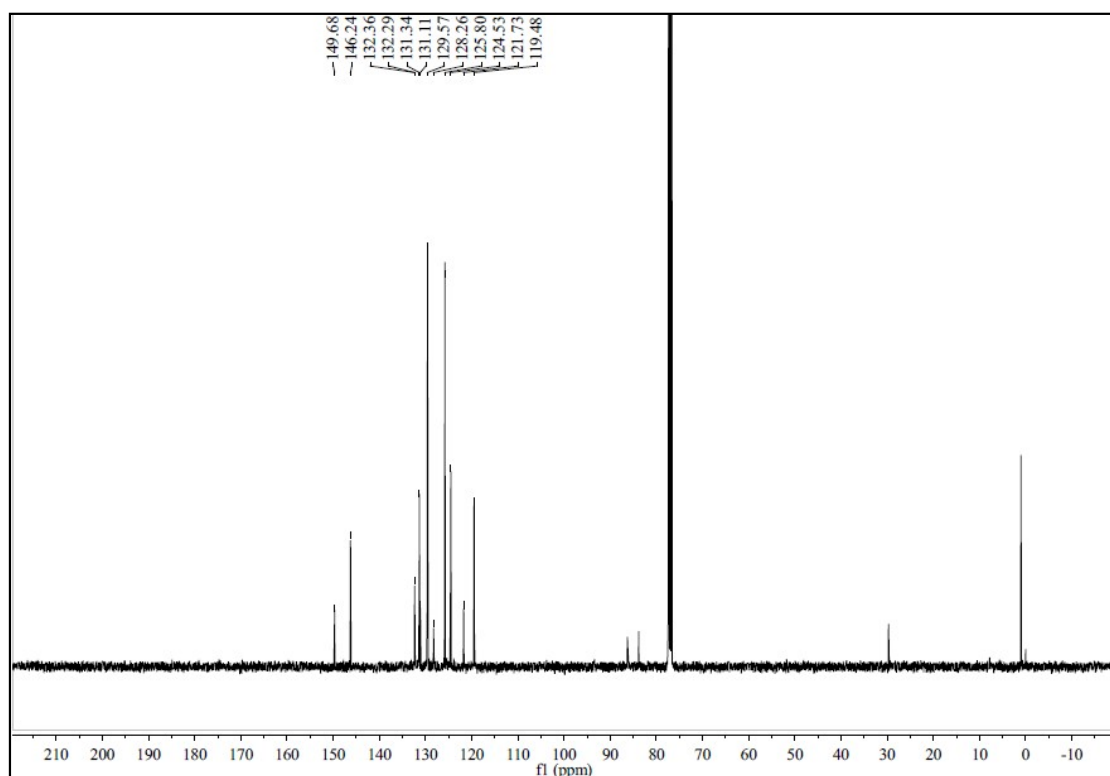

Fig. S2  $^{13}\text{C}$  NMR spectrum of **o-1** in  $\text{CDCl}_3$ .

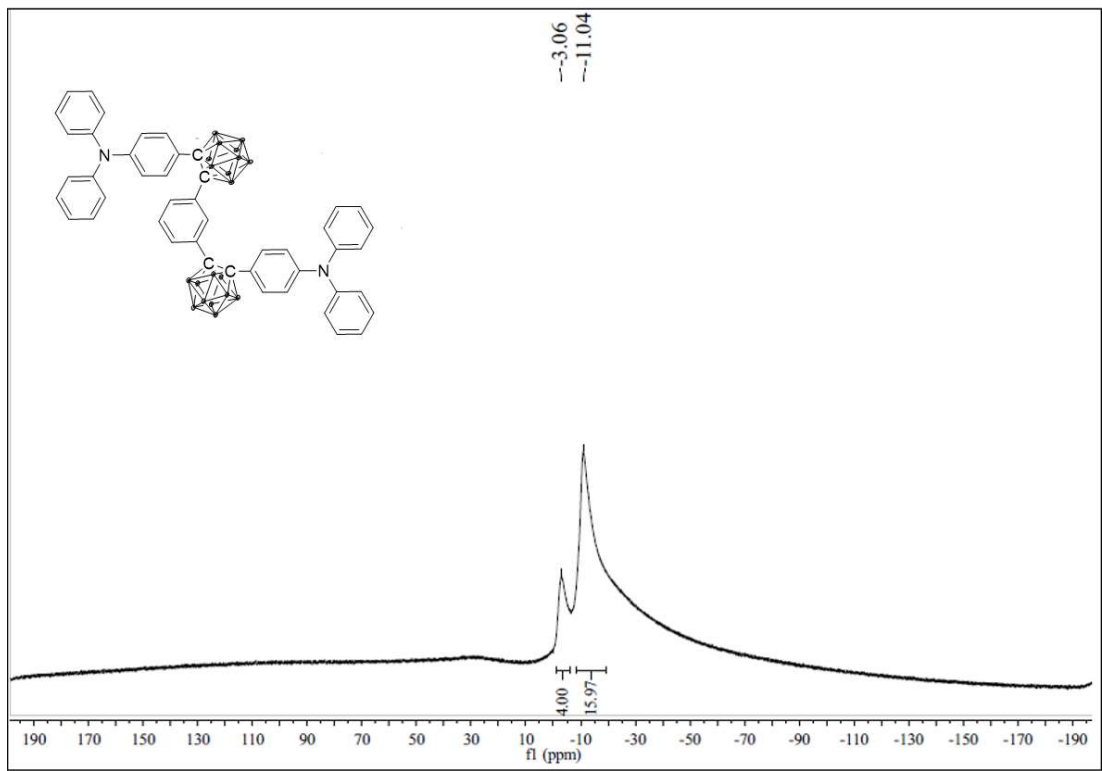

**Fig. S3**  $^{11}\text{B}$  NMR spectrum of *o*-1 in  $\text{CDCl}_3$ .

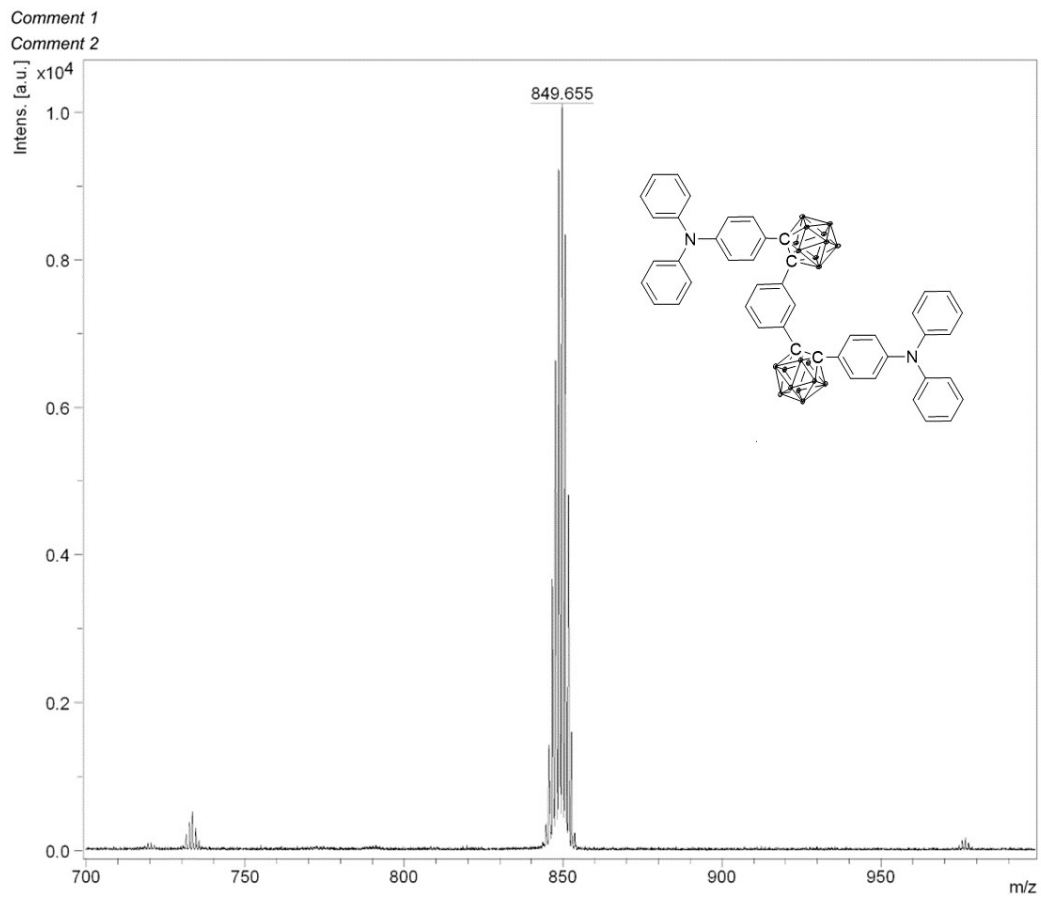

**Fig. S4** MALDI-TOF mass spectrum of *o*-1.

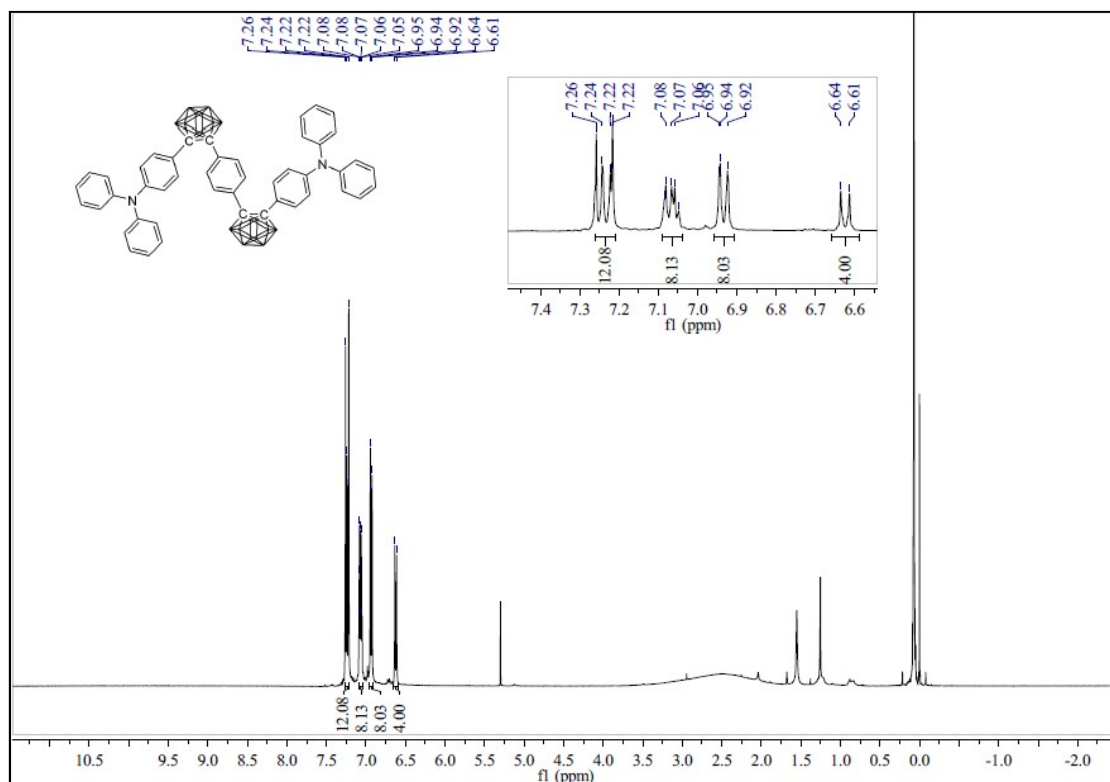

Fig. S5  $^1\text{H}$  NMR spectrum of *o-2* in  $\text{CDCl}_3$ .

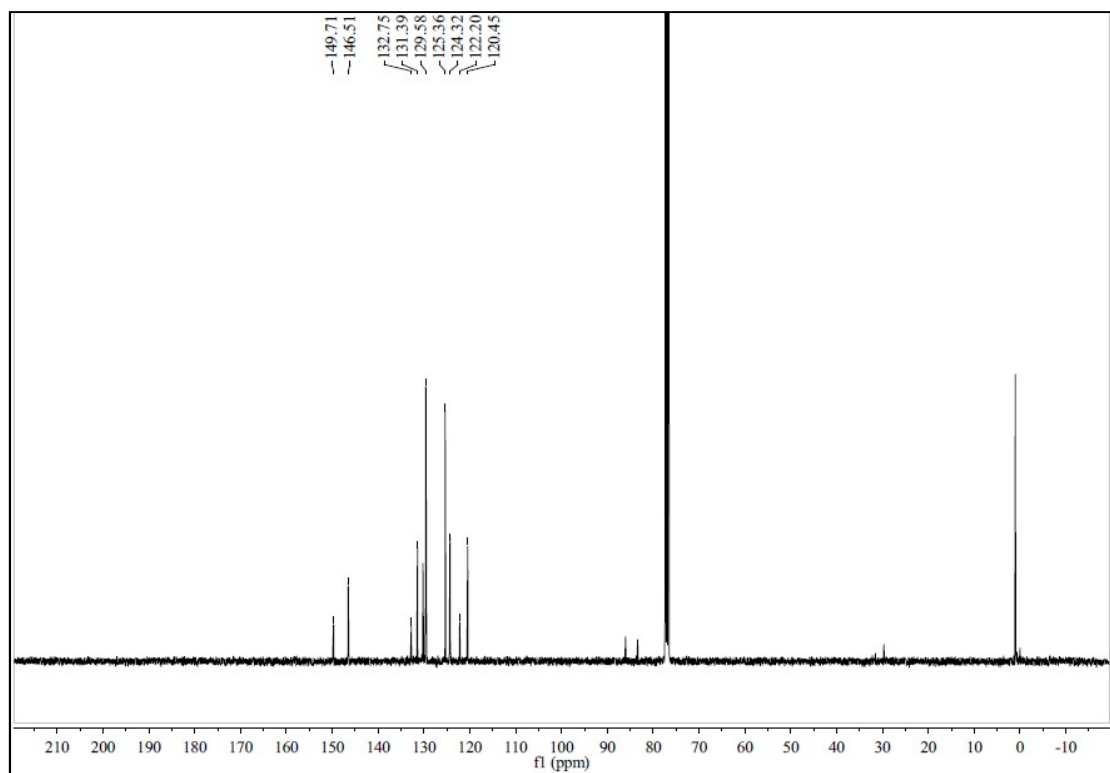

Fig. S6  $^{13}\text{C}$  NMR spectrum of *o-2* in  $\text{CDCl}_3$ .

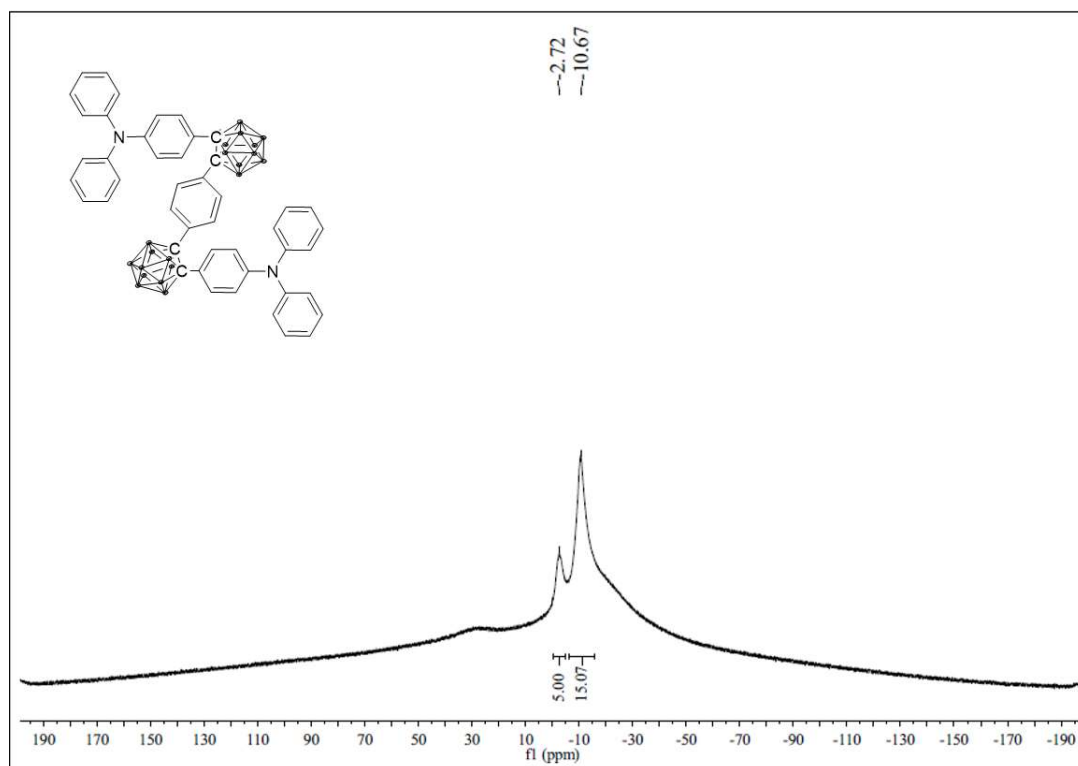

**Fig. S7**  $^{11}\text{B}$  NMR spectrum of **o-2** in  $\text{CDCl}_3$ .

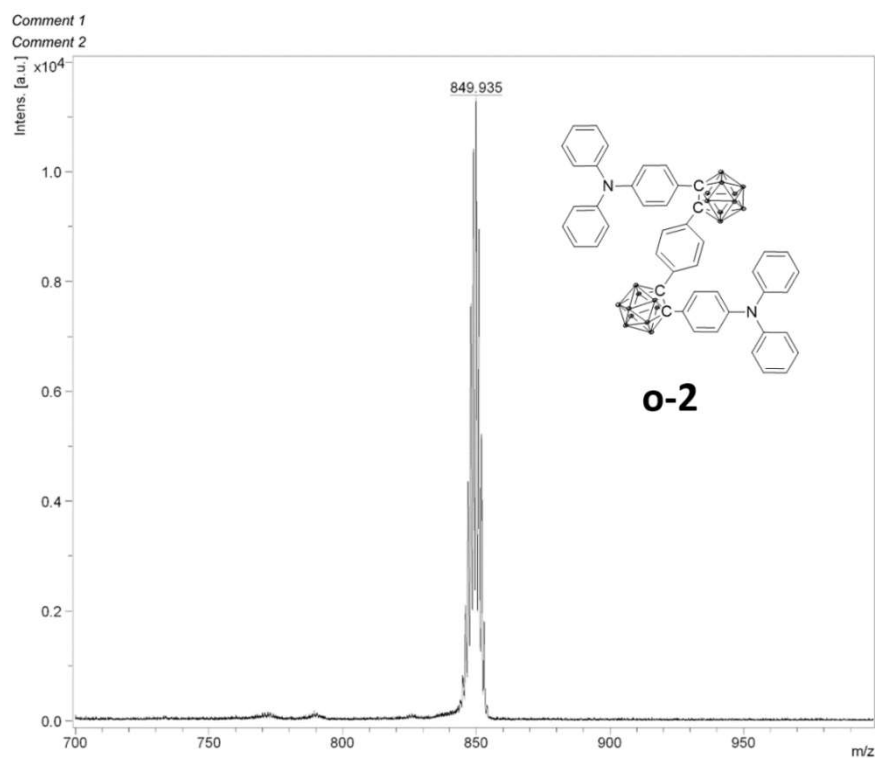

**Fig. S8** MALDI-TOF mass spectra of **o-2**.

## 2 Thermo-gravimetric analysis

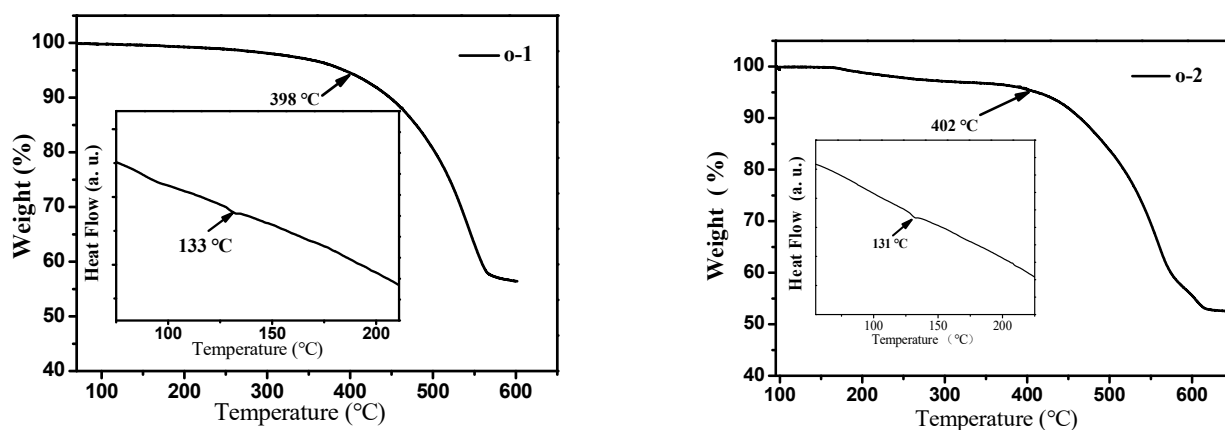

Fig. S9 TGA and DSC curves of *o-1*, *o-2* at a heating rate of  $10^{\circ}\text{C min}^{-1}$ .

## 3 Solvatochromism

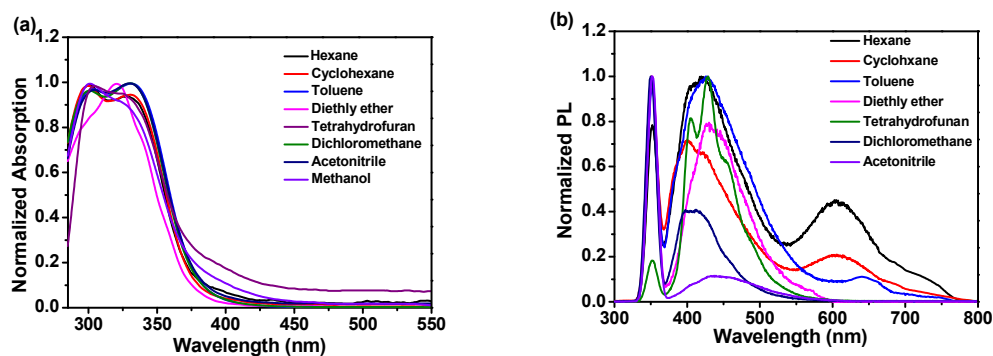

Fig. S10 (a) UV-vis absorption and (b) emission spectra of *o-2* in various solvents at room temperature.

#### 4 Time-resolved emission decay

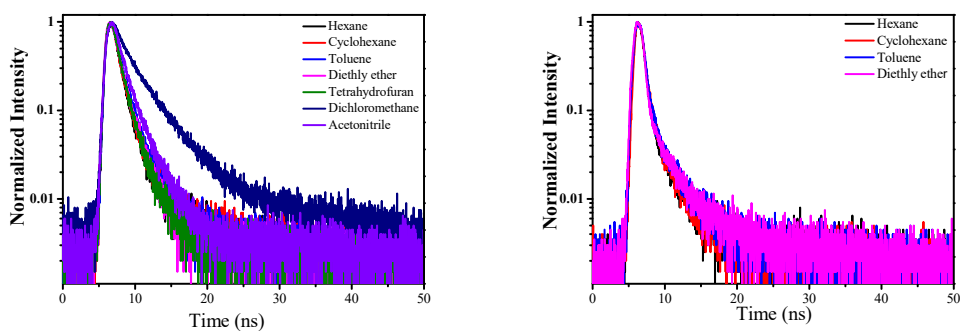

Fig. S11 Emission decay profiles for *o-1* in various solvents.

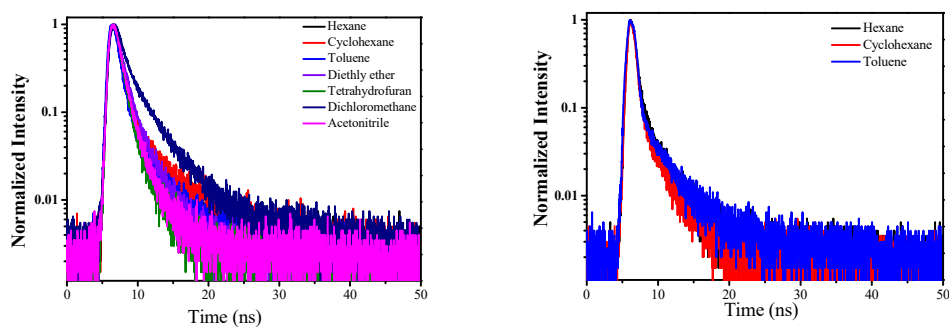

Fig. S12 Emission decay profiles for *o-2* in various solvents.

Table S1 Emission Lifetimes ( $\tau_{em}$ 's) of *o-1* and *o-2*

| Solvent                         | <i>o-1</i> (ns) |          |          |          | <i>o-2</i> (ns) |          |          |          |
|---------------------------------|-----------------|----------|----------|----------|-----------------|----------|----------|----------|
|                                 | TICT            |          | TICT     |          | TICT            |          | TICT     |          |
|                                 | $\tau_1$        | $\tau_2$ | $\tau_1$ | $\tau_2$ | $\tau_1$        | $\tau_2$ | $\tau_1$ | $\tau_2$ |
| Hex                             | 0.93            | 2.78     | 0.46     | 2.78     | 0.86            | 3.56     | 0.42     | 2.48     |
| Cyhex                           | 0.96            | 2.89     | 0.58     | 2.91     | 0.85            | 4.32     | 0.44     | 2.75     |
| Tol                             | 1.13            | 2.89     | 0.64     | 2.98     | 0.83            | 3.40     | 0.47     | 3.13     |
| Et <sub>2</sub> O               | 1.02            | 2.13     | --       | --       | 0.98            | 3.24     | --       | --       |
| THF                             | 0.99            | 2.69     | --       | --       | 0.94            | 4.68     | --       | --       |
| CH <sub>2</sub> Cl <sub>2</sub> | 1.64            | 4.00     | --       | --       | 1.21            | 3.83     | --       | --       |
| ACN                             | 1.28            | 3.25     | --       | --       | 1.03            | 3.06     | --       | --       |
| <b>Film</b>                     | 0.60            | 2.26     | 3.09     | 9.88     | 0.46            | 1.99     | 1.11     | 8.68     |

## 5 Density functional calculations

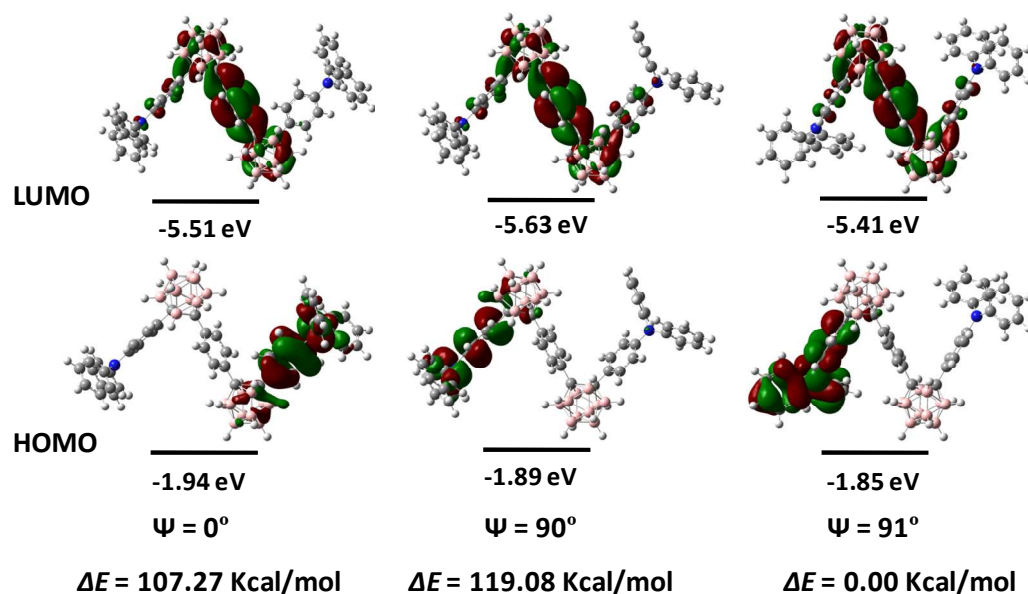

**Fig. S13** Calculated HOMO and LUMO distributions of *o*-1 with the dihedral angles ( $\psi$ ) between the TPA and the phenyl ring of  $0^\circ$ ,  $90^\circ$  and  $91^\circ$ . The difference of total energy and energy levels of each orbital were calculated at the B3LYP/6-31G(d) level by TD-DFT.

## 6 Electrochemistry

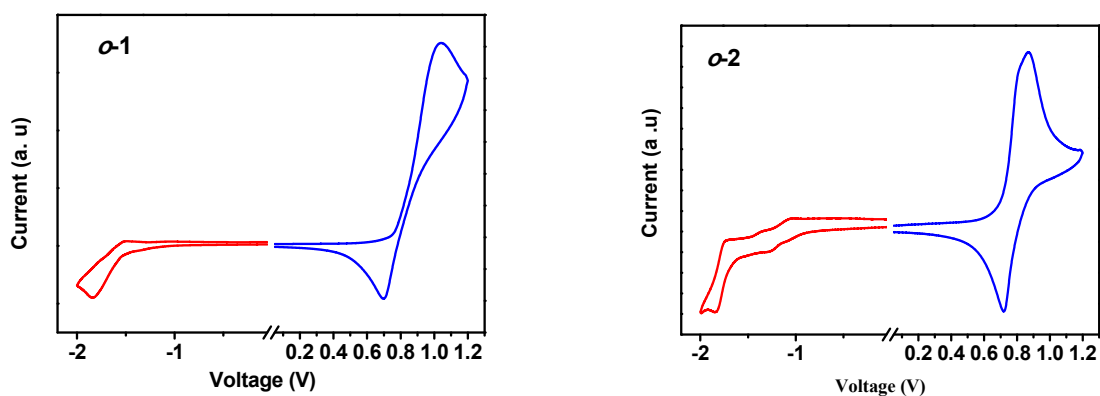

**Fig. S14** Cyclic voltammograms of *o*-1 and *o*-2.



## 7 Emission spectra and Time-resolved emission decay

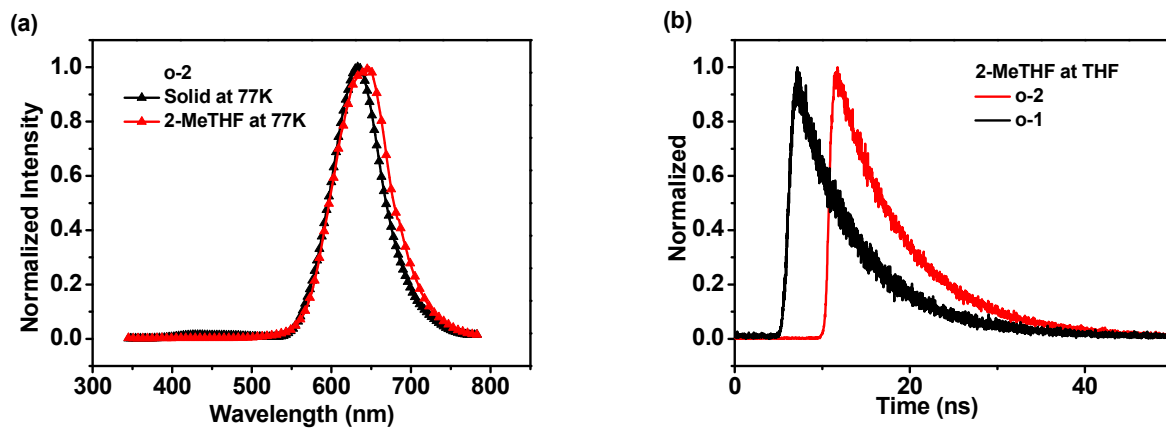

**Fig. S15** (a) Emission spectra of *o*-2 in solid state and in 2-MeTHF solution at 77 K; (b) Decay time of *o*-1, *o*-2 ( $1 \times 10^{-5}$  M) in 2-MeTHF at 77 K.
